# Supplementary material for: Aspirin sensitizes osimertinib‐resistant NSCLC cells in vitro and in vivo via Bim‐dependent apoptosis induction
Source: PubMed Central journal article supplement (PMC7266273; doi:10.1002/1878-0261.12682), 2020-05-05
Supplement: MOL2-14-1152-s003.pdf [file MOL2-14-1152-s003.pdf]

Table S1. Patient Characteristics

| Characteristics | No. of Patients (%) |                               |                       | <i>P</i> |
|-----------------|---------------------|-------------------------------|-----------------------|----------|
|                 | Total (N=45)        | Osimertinib+Aspirin<br>(n=14) | Osimertinib<br>(n=31) |          |
| Age, y          |                     |                               |                       |          |
| Median (range)  | 59 (38-84)          | 58 (38-84)                    | 60 (43-74)            | 0.995    |
| <65             | 32 (71.1)           | 11 (78.6)                     | 21 (67.7)             |          |
| ≥65             | 13 (28.9)           | 3 (21.4)                      | 10 (32.3)             |          |
| Gender          |                     |                               |                       | 0.355    |
| Male            | 21 (46.7)           | 8 (57.1)                      | 13 (41.9)             |          |
| Female          | 24 (53.3)           | 6 (42.9)                      | 18 (58.1)             |          |
| EGFR mutation   |                     |                               |                       | 0.120    |
| 19del           | 27 (60.0)           | 6 (42.9)                      | 21 (67.7)             |          |
| L858R           | 18 (40.0)           | 8 (57.1)                      | 10 (32.3)             |          |
| PFS             |                     |                               |                       |          |
| Median (range)  | 11.0 (2.0-35.9)     | 15.3 (7.0-35.9)               | 9.3 (2.0-26.9)        | 0.023    |
